# Supplementary material for: Two RNA binding proteins, ADAD2 and RNF17, interact to form a heterogeneous population of novel meiotic germ cell granules with developmentally dependent organelle association
Source: PubMed Central journal article supplement (PMC10359003; doi:10.1371/journal.pgen.1010519), 2023-07-10

Fig S10

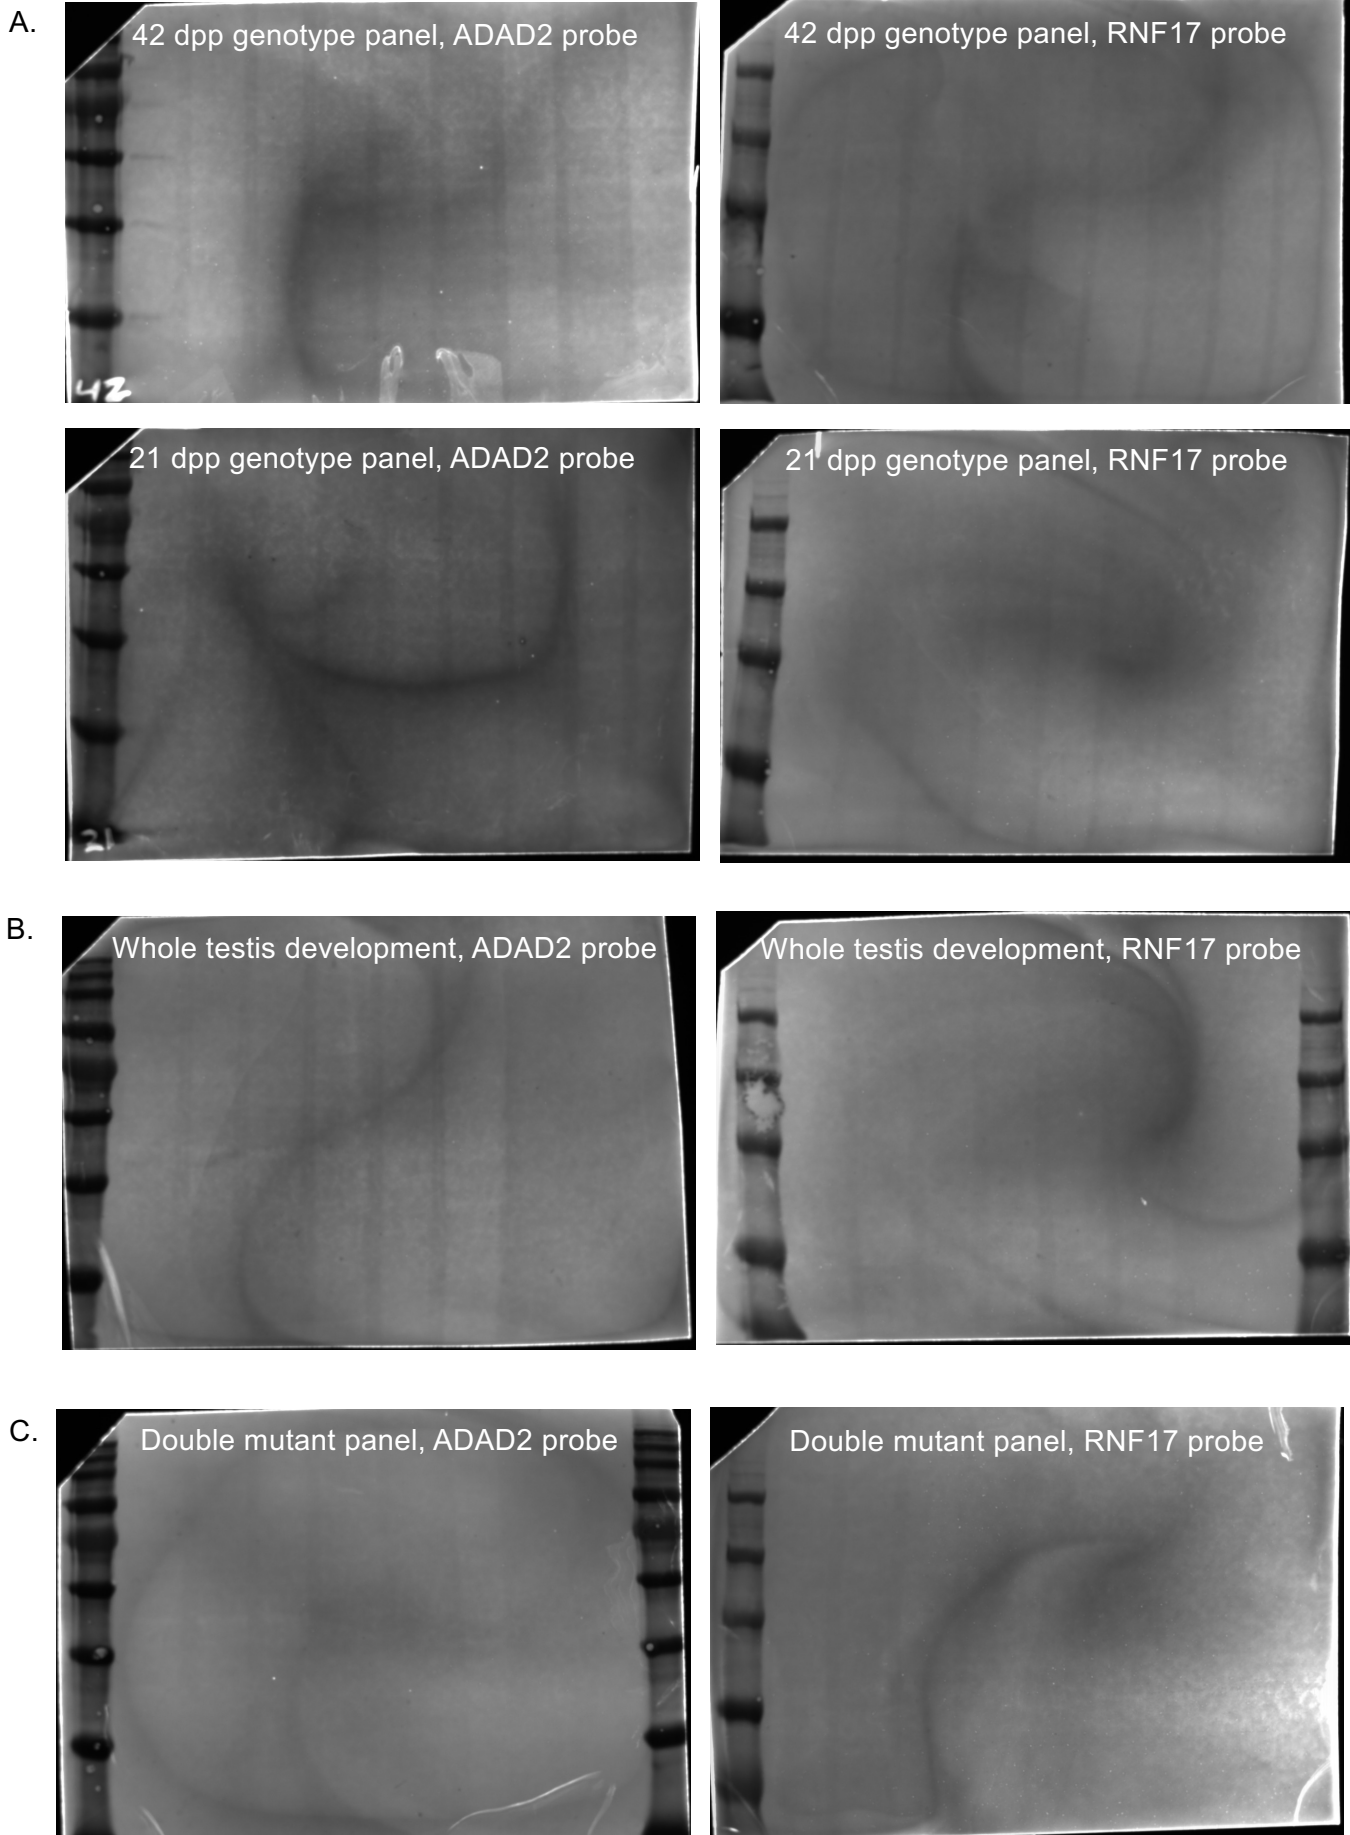

Supplement: pgen.1010519.s010.pdf [file pgen.1010519.s010.pdf]
